# Supplementary material for: A Critical Review of Statistical Methods for Twin Studies Relating Exposure to Early Life Health Conditions
Source: MDPI journal article supplement (doi:10.3390/ijerph182312696), 2021-12-02
Supplement: s1 [file s1]

## Supplementary Material S1: A critical review of statistical methods for twin studies relating exposure to early life health conditions: Search Strategy

### PUBMED

("Infant"[Mesh] OR "Child"[Mesh] OR newborn\*[TIAB] OR infant\*[TIAB] OR child\*[TIAB]) AND ("Twins"[Mesh] OR twin\*[TIAB]) AND ("Diet, Food, and Nutrition"[Mesh] OR "dietary habit\*" [TIAB] OR "dietary behav\*" [TIAB] OR "food habit\*" [TIAB] OR "food behav\*" [TIAB] OR "nutrition habit\*" [TIAB] OR "nutrition behav\*" [TIAB] OR "nutritional habit\*" [TIAB] OR "nutritional behav\*" [TIAB] OR "eating habit\*" [TIAB] OR "eating behav\*" [TIAB] OR "feeding habit\*" [TIAB] OR "feeding behav\*" [TIAB] OR "alimentary habit\*" [TIAB] OR "alimentary behav\*" [TIAB] OR expos\*[TIAB]) AND ("Asthma"[Mesh] OR asthma\*[TIAB] OR "Eczema"[Mesh] OR eczema[TIAB] OR "atopic dermatitis"[TIAB] OR "Rhinitis"[Mesh] OR rhinitis[TIAB] OR "Obesity"[Mesh] OR obes\*[TIAB] OR "Neurodevelopmental Disorders"[Mesh] OR neurodevelopment\*[TIAB] OR neuropsycholog\*[TIAB]) AND y\_10[Filter] AND english[Filter] NOT ("animals"[Mesh] NOT "humans"[Mesh])

### SCOPUS

TITLE-ABS-KEY(infant\* OR newborn\* OR child\*) AND TITLE-ABS-KEY(twin\*) AND TITLE-ABS-KEY("dietary habit\*" OR "dietary behav\*" OR "food habit\*" OR "food behav\*" OR "nutrition habit\*" OR "nutrition\* behav\*" OR "eating habit\*" OR "eating behav\*" OR "feeding habit\*" OR "feeding behav\*" OR "alimentary habit\*" OR "alimentary behav\*" OR expos\*) AND TITLE-ABS-KEY(asthm\* OR eczema OR "atopic dermatitis" OR rhinitis OR obes\* OR neurodevelopment\* OR neuropsycholog\*) AND PUBYEAR AFT 2010 AND LANGUAGE(english)

### WEB OF SCIENCE

(TI=(infant\* OR newborn\* OR child\*) OR AB=(infant\* OR newborn\* OR child\*)) AND (TI=twin\* OR AB=twin\*) AND (TI=("dietary habit\*" OR "dietary behav\*" OR "food habit\*" OR "food behav\*" OR "nutrition\* habit\*" OR "nutrition\* behav\*" OR "eating habit\*" OR "eating behav\*" OR "feeding habit\*" OR "feeding behav\*" OR "alimentary habit\*" OR "alimentary behav\*" OR expos\*) OR AB=("dietary habit\*" OR "dietary behav\*" OR "food habit\*" OR "food behav\*" OR "nutrition habit\*" OR "nutrition\* behav\*" OR "eating habit\*" OR "eating behav\*" OR "feeding habit\*" OR "feeding behav\*" OR "alimentary habit\*" OR "alimentary behav\*" OR expos\*)) AND (TI=(asthm\* OR eczema OR "atopic dermatitis" OR rhinitis OR obes\* OR neurodevelopment\* OR neuropsycholog\*) OR AB=(asthm\* OR eczema OR "atopic dermatitis" OR rhinitis OR obes\* OR neurodevelopment\* OR neuropsycholog\*)) AND PY=(2011-2021) AND LA=(English)

### EMBASE

('infant'/exp OR 'child'/exp OR 'newborn'/exp OR newborn\*:ab,ti OR infant\*:ab,ti OR child\*:ab,ti) AND ('twins'/exp OR twin\*:ab,ti) AND ('diet'/exp OR 'food'/exp OR 'nutrition'/exp OR 'dietary habit\*':ab,ti OR 'dietary behav\*':ab,ti OR 'food habit\*':ab,ti OR 'food behav\*':ab,ti OR 'nutrition habit\*':ab,ti OR 'nutrition behav\*':ab,ti OR 'nutritional habit\*':ab,ti OR 'nutritional behav\*':ab,ti OR 'eating habit\*':ab,ti OR 'eating behav\*':ab,ti OR 'feeding habit\*':ab,ti OR 'feeding behav\*':ab,ti OR 'alimentary habit\*':ab,ti OR 'alimentary behav\*':ab,ti OR expos\*:ab,ti) AND ('asthma'/exp OR asthma\*:ab,ti OR 'eczema'/exp OR eczema:ab,ti OR 'atopic dermatitis':ab,ti OR 'rhinitis'/exp OR rhinitis:ab,ti OR 'obesity'/exp OR obes\*:ab,ti OR 'neurodevelopmental impairment'/exp OR neurodevelopment\*:ab,ti OR neuropsycholog\*:ab,ti) AND [english]/lim AND [embase]/lim AND [2011-2021]/py NOT ([animals]/lim NOT [humans]/lim)
